# Supplementary material for: Size Effect in Hybrid TiO2:Au Nanostars for Photocatalytic Water Remediation Applications
Source: MDPI journal article supplement (doi:10.3390/ijms232213741), 2022-11-08
Supplement: s1 [file s1]

## Supporting Information

# Size Effect in Hybrid TiO<sub>2</sub>:Au Nanostars for Photocatalytic Water Remediation Applications

Fangyuan Zheng <sup>1</sup>, Pedro M. Martins <sup>2,3</sup>, Joana M. Queirós <sup>2,3,4</sup>, Carlos J. Tavares <sup>4,5</sup>, José Luis Vilas-Vilela <sup>1,6</sup>, Senentxu Lanceros-Méndez <sup>1,7</sup> and Javier Reguera <sup>1,\*</sup>

BCMaterials, Basque Center for Materials, Applications and Nanostructures, UPV/EHU Science Park, 48940 Leioa, Spain

<sup>2</sup> Centre of Molecular and Environmental Biology (CBMA), University of Minho, 4710-057 Braga, Portugal

<sup>3</sup> Institute for Research and Innovation on Bio-Sustainability (IB-S), University of Minho, 4710-057 Braga, Portugal

<sup>4</sup> Physics Centre of Minho and Porto Universities (CF-UM-UP), University of Minho, 4710-057 Braga, Portugal

<sup>5</sup> LaPMET — Laboratory of Physics for Materials and Emergent Technologies, University of Minho, 4710-057 Braga, Portugal

<sup>6</sup> Macromolecular Chemistry Research Group (LABQUIMAC), Department of Physical Chemistry, Faculty of Science and Technology, University of the Basque Country (UPV/EHU), 48940 Leioa, Spain

<sup>7</sup> Ikerbasque, Basque Foundation for Science, 48009 Bilbao, Spain

\* Correspondence: javier.reguera@bcmaterials.net

S-1: Xenon Lamp and sunlight spectra

S-2: Morphology of Au in TiO<sub>2</sub>:Au-NSph

S-3: EDX mapping of Au in TiO<sub>2</sub>:Au-NSph

S-4: Amount of Au wt. % in TiO<sub>2</sub>:Au-NSs

S-5: Photolysis of ciprofloxacin under UV radiation

S-6: Photolysis of ciprofloxacin under visible radiation

S-7: X-ray diffraction spectra of TiO<sub>2</sub>:Au-NSs-A, B and C nanocomposites after photocatalytic application

S-8: Photogenerated ROS (•OH and <sup>1</sup>O<sub>2</sub>) measurements

S-9: Photolysis of ciprofloxacin under blue, green, red, and NIR light radiation

S-10: Detected degradation products of CIP by HPLC

### S-1: Xenon Lamp and sunlight spectra

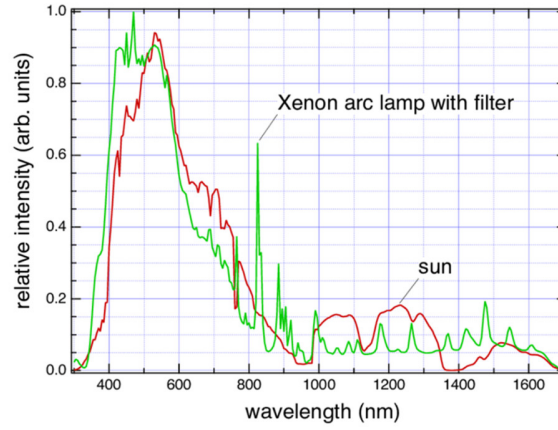

**Figure S1.** Xenon Lamp arc (with UV filter) and sunlight spectra.

### S-2: Morphology of Au in TiO<sub>2</sub>:Au-NSph

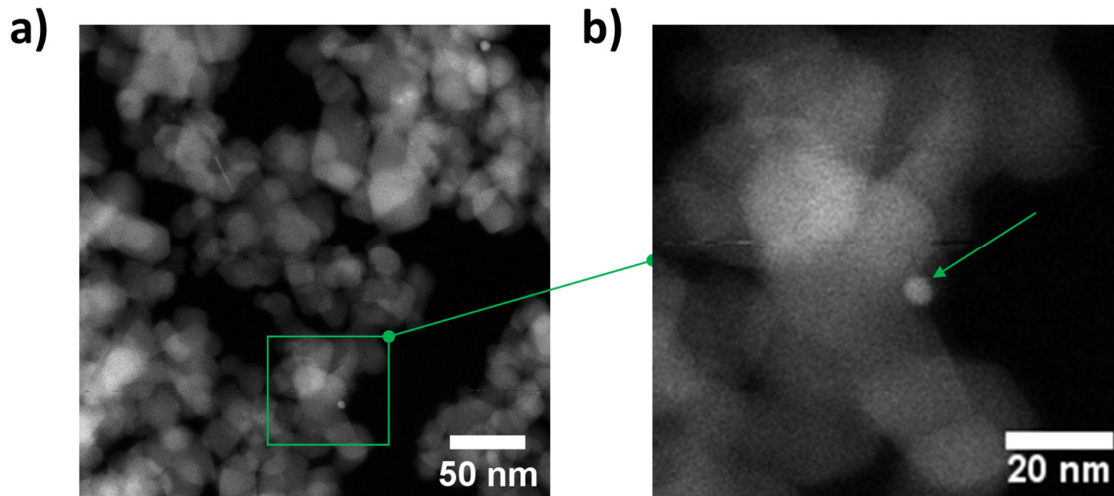

**Figure S2.** STEM-HAADF micrographs of TiO<sub>2</sub>:Au-NSph with different magnifications (a,b). Au nanoparticles appear as whiter, smaller, and quite circular shapes, scattered through the sample. The zoom-in, with the green arrow, shows one of these Au nanoparticles bound to a TiO<sub>2</sub> nanoparticle surface.

### S-3: EDX mapping of Au in TiO<sub>2</sub>:Au-NSph

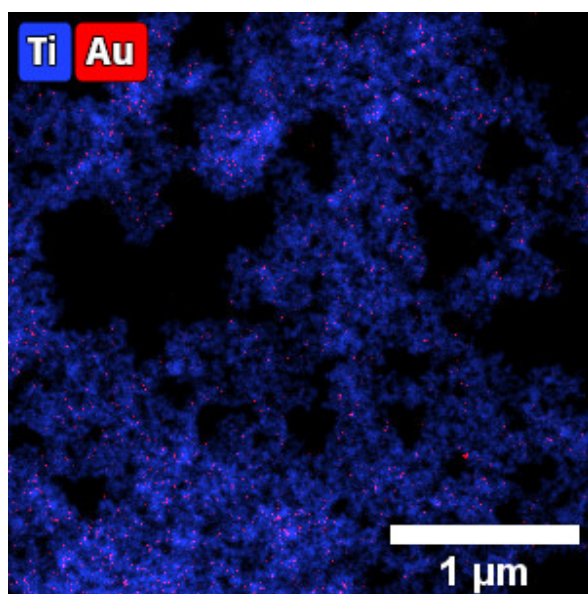

**Figure S3.** EDX mapping of TiO<sub>2</sub>:Au-NSph: Au (red) and Ti (blue).

### S-4: Amount of Au wt. % in TiO<sub>2</sub>:Au-NSs

**Table S1.** Amount of Au with respect to TiO<sub>2</sub> (wt. %) in the samples, theoretical value (considering the added reagents in the synthesis reaction) vs. XRF measurement.

| Sample                     | Au:TiO <sub>2</sub> wt. %<br>Theoretical | Au:TiO <sub>2</sub> wt. %<br>XRF |
|----------------------------|------------------------------------------|----------------------------------|
| TiO <sub>2</sub> :Au-NSph  | 0.05                                     | *                                |
| TiO <sub>2</sub> :Au-NSs-A | 0.68                                     | *                                |
| TiO <sub>2</sub> :Au-NSs-B | 2.55                                     | 2.38                             |
| TiO <sub>2</sub> :Au-NSs-C | 6.30                                     | 5.83                             |

\* No detected Au since the amount of Au is less than 1% w.t. in sample.

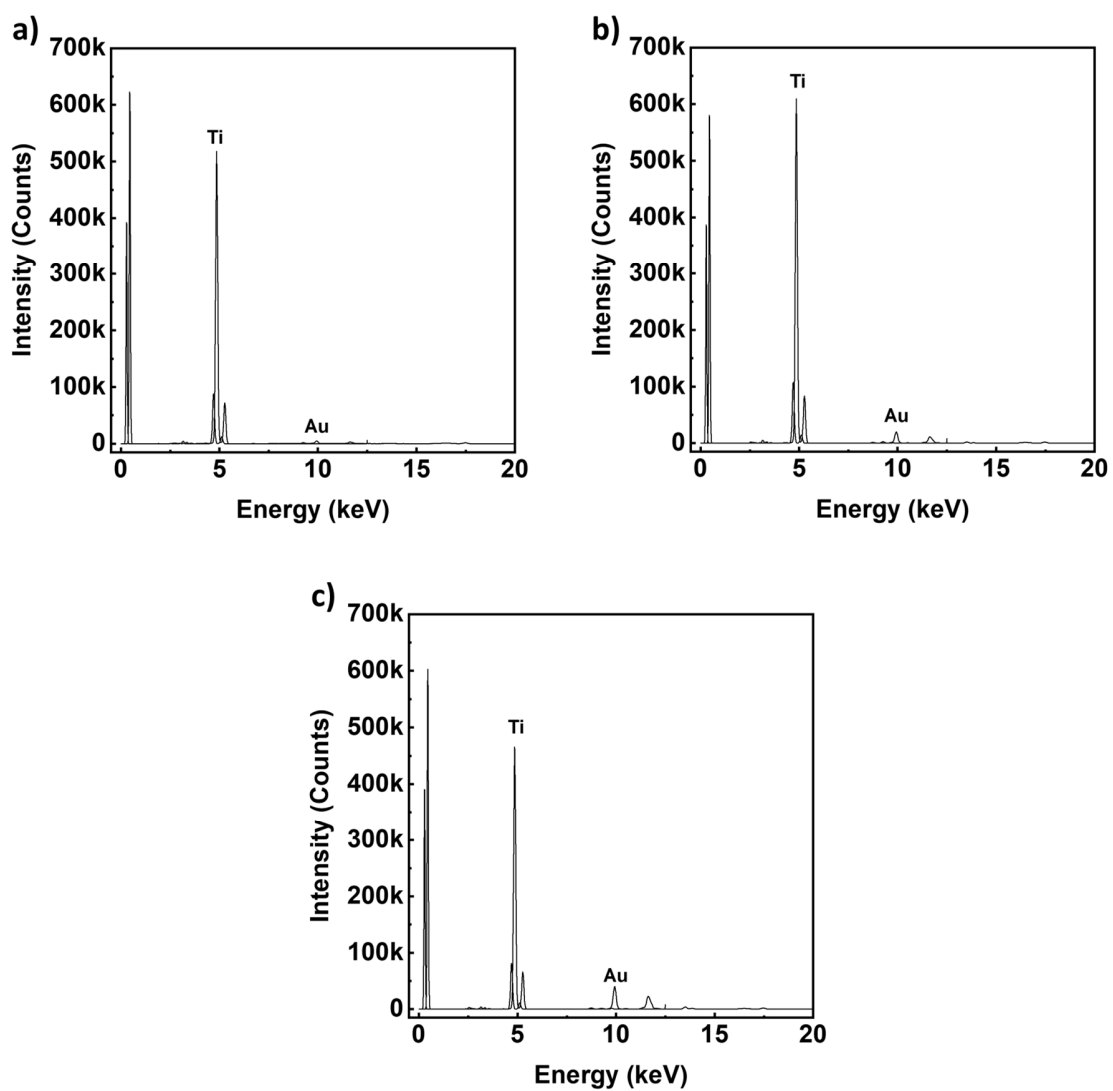

**Figure S4.** XRF spectrum of TiO<sub>2</sub>:Au-NSs-A (a), TiO<sub>2</sub>:Au-NSs-B (b), and TiO<sub>2</sub>:Au-NSs-C (c).

**S-5: Photolysis of ciprofloxacin under UV radiation**

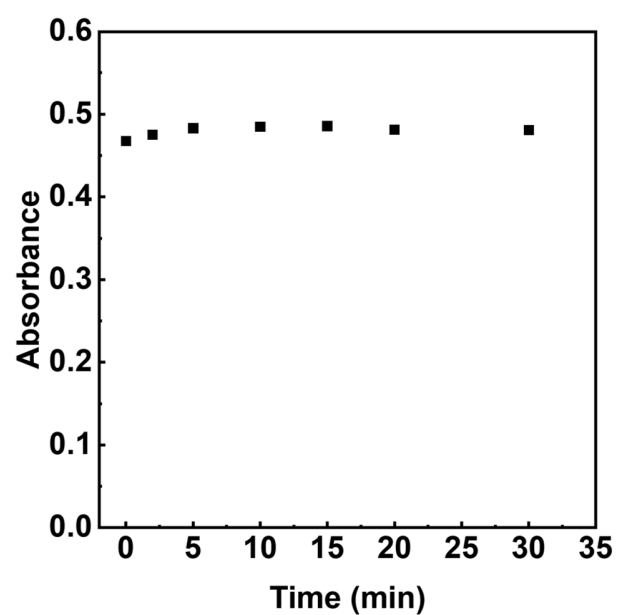

**Figure S5.** Photolysis assay of CIP (5 mg/L) under 30 minutes of UV radiation.

**S-6: Photolysis of ciprofloxacin under visible radiation**

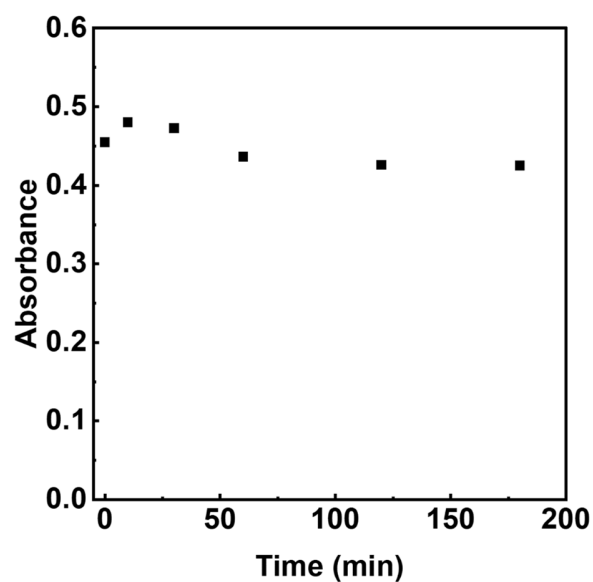

**Figure S6.** Photolysis assay of CIP (5 mg/L) under 180 minutes of visible radiation.

**S-7: X-ray diffraction spectra of TiO<sub>2</sub>:Au-NSs-A, B, and C nanocomposites after photocatalytic application**

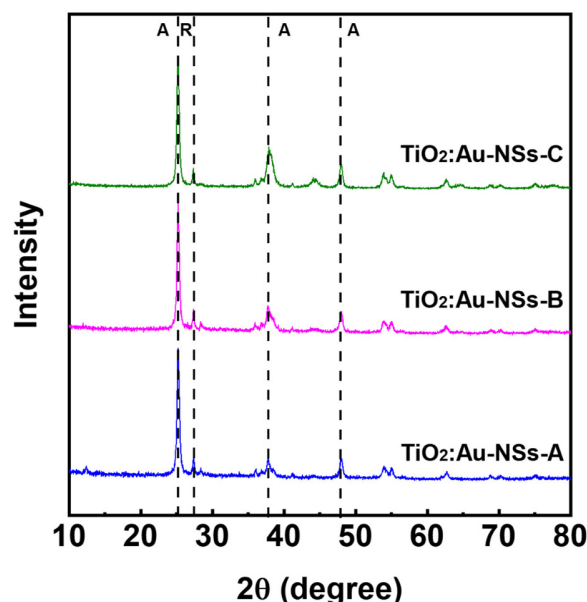

**Figure S7.** X-ray diffraction spectra of TiO<sub>2</sub>:Au-NSs-A, B, and C nanocomposites after photocatalytic application.

**S-8: Photogenerated ROS ( $\cdot\text{OH}$  and  $^1\text{O}_2$ ) measurements**

- Detection of hydroxyl radicals ( $\cdot\text{OH}$ )**

The hydroxyl radicals ( $\cdot\text{OH}$ ) produced after illumination were detected and quantified as previously reported [1] by fluorescence spectroscopy through the hydroxylation reaction of terephthalic acid (TA) to 2-hydroxyterephthalic acid (2-HTA) in the heterogeneous phase.

Firstly, a TA solution (0.5 mM) was prepared by dissolving TA in a dilute NaOH solution (2 mM). Then, 50 mg nanoparticles as photocatalysts were dispersed in 50 mL of TA solution (0.5 mM) and stirred in the dark for 30 min. Afterwards, the suspension was stirred and irradiated for 30 minutes under UV illumination. An aliquot was taken out at different irradiation times and centrifuged to eliminate the nanoparticles. 200  $\mu\text{L}$  of supernatant was taken out and analysed using a microplate reader Infinite 200 Pro. This analysis was carried out by evaluating the emission peak at 425 nm of the 2-HTA which has an excitation wavelength at 315 nm [2] in the fluorescence spectrum. A calibration curve was constructed to quantify the relationship between the fluorescence signal and the generated hydroxyl radicals, using the 2-HTA as a standard.

- Detection of singlet oxygen ( $^1\text{O}_2$ )**

Singlet oxygen ( $^1\text{O}_2$ ) was determined as previously reported [1], as an indirect way to quantify the generated  $\cdot\text{O}_2^-$ . 50 mg of nanoparticles were added to a mixed solution of 40 mL L-histidine solution (0.2 mM) and 10 mL solution of N,N-p-nitrosodimethylaniline solution (0.2 mM). Afterwards, the suspension was stirred in the dark for 30 min and then irradiated for 30 min under UV illumination. At different irradiation times, aliquots were taken out, centrifuged, and then analysed using a microplate reader Infinite 200 Pro. This analysis was

performed by evaluating the characteristic band of N,N-p-nitrosodimethylaniline at 440 nm in the UV-Vis spectrum.

The produced  $^1\text{O}_2$  was quantified from the calibration curve between absorbance and N,N-p-nitrosodimethylaniline solution concentration.

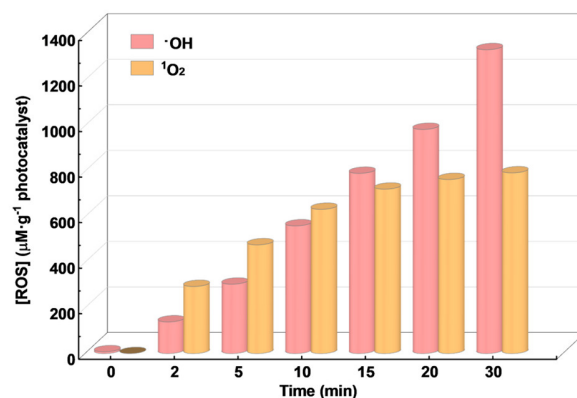

**Figure S8.** Quantification of photogenerated hydroxyl radical ( $\cdot\text{OH}$ ) and singlet oxygen ( $^1\text{O}_2$ ) by  $\text{TiO}_2\text{:Au-NSs-A}$  under 30 minutes of UV radiation.

#### S-9: Photolysis of ciprofloxacin under blue, green, red, and NIR light radiation

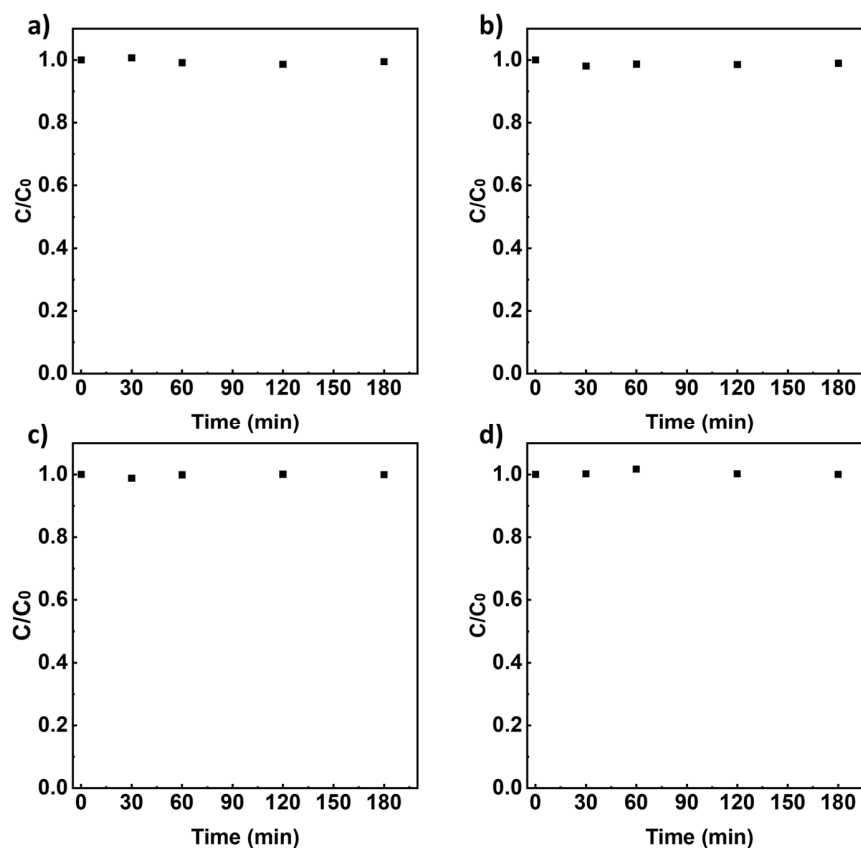

**Figure S9.** Photolysis assay of CIP (5 mg/L) under 180 minutes of blue (a), green (b), red (c) and NIR light (d) radiation.

**S-10: Detected degradation products of CIP by HPLC**

**Table S2.** Detected degradation products of CIP.

| <b>Detected Molecule</b>                                        | <b>*Detected<br/>m/z</b> | <b>Theoretical<br/>m/z</b> | <b>Mass Error<br/>(mDa)</b> | <b>Mass Error<br/>(ppm)</b> |
|-----------------------------------------------------------------|--------------------------|----------------------------|-----------------------------|-----------------------------|
| C <sub>17</sub> H <sub>19</sub> N <sub>3</sub> O <sub>3</sub> F | 332.1412                 | 332.141                    | 0.2                         | 0.5                         |
| C <sub>17</sub> H <sub>20</sub> N <sub>3</sub> O <sub>4</sub>   | 330.1451                 | 330.1454                   | -0.3                        | -0.9                        |
| C <sub>16</sub> H <sub>17</sub> N <sub>3</sub> O <sub>4</sub> F | 334.1202                 | 334.1203                   | -0.1                        | -0.3                        |
| C <sub>15</sub> H <sub>17</sub> N <sub>3</sub> O <sub>3</sub> F | 306.1253                 | 306.1254                   | -0.1                        | -0.3                        |
| C <sub>17</sub> H <sub>17</sub> N <sub>3</sub> O <sub>3</sub> F | 330.1257                 | 330.1254                   | 0.3                         | 0.9                         |
| C <sub>13</sub> H <sub>12</sub> N <sub>2</sub> O <sub>3</sub> F | 263.0831                 | 263.0832                   | -0.1                        | -0.4                        |
| C <sub>17</sub> H <sub>18</sub> N <sub>3</sub> O <sub>5</sub>   | 344.1241                 | 344.1246                   | -0.5                        | -1.6                        |
| C <sub>17</sub> H <sub>19</sub> N <sub>3</sub> O <sub>4</sub> F | 348.135                  | 348.136                    | -1                          | -2.8                        |
| C <sub>15</sub> H <sub>18</sub> N <sub>3</sub> O <sub>4</sub>   | 304.1293                 | 304.1297                   | -0.4                        | -1.4                        |
| C <sub>17</sub> H <sub>17</sub> N <sub>3</sub> O <sub>5</sub> F | 362.1146                 | 362.1152                   | -0.6                        | -1.7                        |
| C <sub>17</sub> H <sub>19</sub> N <sub>3</sub> O <sub>5</sub> F | 364.1308                 | 364.1309                   | -0.1                        | -0.2                        |
| C <sub>17</sub> H <sub>17</sub> N <sub>3</sub> O <sub>4</sub> F | 346.1194                 | 346.1203                   | -0.9                        | -2.6                        |

\*The masses correspond to protonated molecule [M+H]<sup>+</sup>.
